# Supplementary material
Source: PubMed Central journal article supplement (PMC2666569)
Supplement: M808656200_1.pdf [file M808656200_1.pdf]

## SUPPLEMENTAL DATA

**Table SI.** One hundred most over-expressed genes in HNE-treated, HSF1 siRNA-transfected vs. HNE-treated, NEG siRNA-transfected samples. Genes with RefSeq entries and Gene Ontology terms are represented.

| Gene Name | Protein RefSeq | Gene Description                                            | Gene Ontology Terms, Examples                                                                                                                 | Fold Change |
|-----------|----------------|-------------------------------------------------------------|-----------------------------------------------------------------------------------------------------------------------------------------------|-------------|
| LEAP2     | NP_443203      | Liver-expressed antimicrobial peptide 2 precursor           | defense response to bacteria                                                                                                                  | +5.64       |
| SPRY2     | NP_005833      | Sprouty homolog 2                                           | cell-cell signaling; regulation of signal transduction; organ morphogenesis; development; membrane; microtubule                               | +5.36       |
| ANKRD1    | NP_055206      | Ankyrin repeat domain 1                                     | DNA binding; nucleus; defense response; signal transduction                                                                                   | +4.77       |
| SKIL      | NP_005405      | Ski-like protein                                            | transcription corepressor activity; nucleus; signal transduction; cell differentiation                                                        | +4.35       |
| KLF10     | NP_005646      | TGFB-inducible early growth response protein 1              | skeletal development; nucleus; regulation of transcription; cell-cell signaling; negative regulation of cell proliferation; metal ion binding | +4.19       |
| RND3      | NP_005159      | Rho-related GTP-binding protein RhoE                        | nucleotide binding; GTP binding; small GTPase mediated signal transduction; protein transport                                                 | +3.63       |
| BHLHB3    | NP_110389      | Class B basic helix-loop-helix protein 3                    | transcription factor activity; nucleus; regulation of transcription; cell proliferation; organ morphogenesis; cell differentiation            | +3.45       |
| SPDYA     | NP_877433      | Speedy homolog 1                                            | protein kinase binding; cell cycle; cell proliferation; response to DNA damage stimulus; organ morphogenesis                                  | +3.39       |
| TRIB1     | NP_079471      | Tribbles homolog 1                                          | nucleotide binding; protein kinase activity                                                                                                   | +3.34       |
| NAB1      | NP_005957      | NGFI-A binding protein 1                                    | nucleic acid binding; nucleus; regulation of transcription; transcriptional repressor activity                                                | +3.31       |
| GEM       | NP_005252      | GTP-binding protein GEM                                     | nucleotide binding; calmodulin binding; GTP binding; immune response; cell surface receptor linked signal transduction; membrane              | +3.11       |
| GADD45 A  | NP_001915      | Growth arrest and DNA-damage-inducible protein GADD45 alpha | regulation of cyclin dependent protein kinase activity; nucleus; DNA repair; apoptosis; cell cycle arrest                                     | +3.11       |
| SGK1      | NP_005618      | Serum/glucocorticoid regulated kinase 1                     | ATP binding; protein serine/threonine kinase activity; apoptosis; response to DNA damage stimulus; sodium ion transport                       | +3.10       |
| BIRC3     | NP_001156      | Baculoviral IAP repeat-containing 3                         | ubiquitin-protein ligase activity; regulation of apoptosis                                                                                    | +3.04       |
| FRZB      | NP_001454      | Frizzled-related protein                                    | Wnt-protein binding; cell differentiation; skeletal development; membrane                                                                     | +3.04       |
| FILIP1L   | NP_878913      | Filamin A interacting protein 1-like                        | myosin complex                                                                                                                                | +2.99       |
| BHLHB2    | NP_003661      | Basic helix-loop-helix domain containing, class B, 2        | transcription repressor activity; negative regulation of transcription; nucleus                                                               | +2.90       |
| CPEB2     | NP_872291      | Cytoplasmic polyadenylation element binding protein 2       | RNA binding; regulation of translation; cytoplasm                                                                                             | +2.84       |
| ERRF1     | NP_061821      | ERBB receptor feedback inhibitor 1                          | Rho GTPase activator activity; response to stress; cytoplasm                                                                                  | +2.81       |
| YOD1      | NP_061036      | YOD1 OTU deubiquinating enzyme 1 homolog                    | CoA hydrolase activity; cysteine-type peptidase activity; ubiquitin-dependent protein catabolic process                                       | +2.80       |
| GJA10     | NP_110399      | Gap junction protein, alpha 10                              | gap junction channel activity; cell communication; response to light stimulus; gamete generation; cell junction                               | +2.73       |
| GADD45 B  | NP_056490      | Growth arrest and DNA-damage-inducible, beta                | activation of MAP3K activity; apoptosis; cell differentiation; regulation of cell cycle; response to stress                                   | +2.69       |
| ID2       | NP_002157      | Inhibitor of DNA binding 2                                  | transcription regulator activity; enucleate erythrocyte differentiation; heart development; positive regulation of macrophage differentiation | +2.66       |
| BCL2L11   | NP_619527      | BCL2-like 11                                                | microtubule binding; regulation of apoptosis; cell-matrix adhesion; lymphocyte homeostasis; regulation of organ growth                        | +2.62       |
| SYDE2     | NP_115560      | Synapse defective 1, Rho GTPase, homolog 2                  | Rho GTPase activator activity; signal transduction                                                                                            | +2.61       |

|         |              |                                                                |                                                                                                                                          |       |
|---------|--------------|----------------------------------------------------------------|------------------------------------------------------------------------------------------------------------------------------------------|-------|
| PLK2    | NP_006613    | Polo-like kinase 2                                             | ATP binding; protein serine/threonine kinase activity; cell cycle; regulation of I-kappaB kinase/NF-kappaB cascade                       | +2.53 |
| HEY1    | NP_036390    | Hairy/enhancer-of-split related with YRPW motif 1              | DNA binding; transcription factor activity; Notch signaling pathway; organ morphogenesis; nucleus                                        | +2.52 |
| KLF4    | NP_004226    | Kruppel-like factor 2                                          | transcription factor activity; nucleus                                                                                                   | +2.50 |
| MMP3    | NP_002413    | Matrix metalloproteinase 3                                     | metalloendopeptidase activity; collagen catabolic process; extracellular                                                                 | +2.49 |
| IDI2    | NP_150286    | Isopentenyl-diphosphate delta isomerase 2                      | isopentenyl-diphosphate delta-isomerase activity; isoprenoid biosynthetic process                                                        | +2.47 |
| MAP2K3  | NP_002747    | Mitogen-activated protein kinase kinase 3                      | ATP binding; MAP kinase kinase activity; protein serine/threonine kinase activity; activation of MAPK activity; signal transduction      | +2.45 |
| SERTAD2 | NP_055570    | SERTA domain containing 2                                      | transcription coactivator activity; negative regulation of cell growth                                                                   | +2.43 |
| DDR2    | NP_001014796 | Discoidin domain receptor tyrosine kinase 2                    | ATP binding; protein tyrosine kinase activity; receptor activity; positive regulation of cell proliferation; integral to plasma membrane | +2.43 |
| OPN1SW  | NP_001699    | Opsin 1                                                        | G-protein coupled receptor protein signaling pathway; signal transduction; visual perception; integral to plasma membrane                | +2.41 |
| BAAT    | NP_001692    | Bile acid Coenzyme A: amino acid N-acyltransferase             | glycine N-choloyltransferase activity; hydrolase activity; bile acid metabolic process                                                   | +2.41 |
| KLF6    | NP_001291    | Kruppel-like factor 6                                          | DNA binding; transcription activator activity; B cell differentiation                                                                    | +2.35 |
| KLF3    | NP_057615    | Kruppel-like factor 3                                          | transcription factor activity                                                                                                            | +2.30 |
| PPM2C   | NP_060914    | Protein phosphatase 2C, magnesium-dependent, catalytic subunit | hydrolase activity; protein amino acid dephosphorylation; mitochondrial matrix                                                           | +2.24 |
| CREB5   | NP_878901    | cAMP responsive element binding protein 5                      | DNA binding; positive regulation of transcription                                                                                        | +2.22 |
| SPINK7  | NP_115955    | Serine peptidase inhibitor, Kazal type 7                       | serine-type endopeptidase inhibitor activity; extracellular                                                                              | +2.21 |
| SPINK9  | NP_001035523 | Serine peptidase inhibitor, Kazal type 9                       | serine-type endopeptidase inhibitor activity; extracellular                                                                              | +2.15 |
| LYSMD3  | NP_938014    | LysM, putative peptidoglycan-binding, domain containing 3      | cell wall catabolic process; integral to membrane                                                                                        | +2.13 |
| KLKB1   | NP_000883    | Kallikrein B, plasma 1                                         | serine-type endopeptidase activity; blood coagulation; inflammatory response; extracellular                                              | +2.13 |
| PLAG1   | NP_002646    | Pleiomorphic adenoma gene 1                                    | transcription factor activity; regulation of transcription; nucleus                                                                      | +2.11 |
| VEGFA   | NP_001020537 | Vascular endothelial growth factor A                           | extracellular matrix binding; angiogenesis; negative regulation of apoptosis; response to hypoxia                                        | +2.11 |
| GCNT4   | NP_057675    | Glucosaminyl (N-acetyl) transferase 4, core 2                  | protein amino acid O-linked glycosylation; Golgi membrane                                                                                | +2.09 |
| HRH1    | NP_001091682 | Histamine receptor H1                                          | histamine receptor activity; inflammatory response; integral to plasma membrane                                                          | +2.07 |
| TAS2R4  | NP_058640    | Taste receptor, type 2, member 4                               | G-protein coupled receptor activity; sensory perception of taste; integral to membrane                                                   | +2.06 |
| SNAPC1  | NP_003073    | Small nuclear RNA activating complex, polypeptide 1            | DNA binding; regulation of transcription                                                                                                 | +2.05 |
| KITLG   | NP_000890    | KIT ligand                                                     | growth factor activity; hemopoiesis; positive regulation of DNA replication                                                              | +2.05 |
| NR4A2   | NP_006177    | Nuclear receptor subfamily 4, group A, member 2                | transcription factor activity; steroid hormone receptor activity; neuron differentiation; nucleus                                        | +2.00 |
| PLA2G10 | NP_003552    | Phospholipase A2, group X                                      | Phospholipase A2 activity; lipid catabolic process; extracellular                                                                        | +1.95 |
| CXCL2   | NP_002080    | chemokine (C-X-C motif) ligand 2                               | chemotaxis; immune response; extracellular                                                                                               | +1.94 |
| AXUD1   | NP_149016    | AXIN1 up-regulated 1                                           | transcription factor activity; apoptosis; nucleus                                                                                        | +1.94 |
| HIVEP2  | NP_006725    | Human immunodeficiency virus type I enhancer binding protein 2 | DNA binding; regulation of transcription; nucleus                                                                                        | +1.93 |

|          |           |                                                                             |                                                                                                                                                  |       |
|----------|-----------|-----------------------------------------------------------------------------|--------------------------------------------------------------------------------------------------------------------------------------------------|-------|
| KDELR3   | NP_006846 | KDEL (Lys-Asp-Glu-Leu) endoplasmic reticulum protein retention receptor 3   | ER retention sequence binding; protein retention in ER lumen; endoplasmic reticulum membrane                                                     | +1.91 |
| IL1RL1   | NP_057316 | Interleukin 1 receptor-like 1                                               | interleukin-1 receptor activity; innate immune response; plasma membrane                                                                         | +1.90 |
| CCL20    | NP_004582 | Chemokine (C-C motif) ligand 20                                             | chemotaxis; immune response; extracellular                                                                                                       | +1.90 |
| ASB15    | NP_563616 | Ankyrin repeat and SOCS box-containing 15                                   | ubiquitin-dependent protein catabolic process                                                                                                    | +1.90 |
| NAB2     | NP_005958 | NGFI-A binding protein 2 (EGR1 binding protein 2)                           | transcription repressor activity; negative regulation of transcription; nucleus                                                                  | +1.88 |
| TSC22D2  | NP_055594 | TSC22 domain family, member 2                                               | transcription factor activity; response to osmotic stress; cytoplasm                                                                             | +1.88 |
| BCOR     | NP_060215 | BCL6 co-repressor                                                           | histone deacetylase binding; negative regulation of transcription; nucleus                                                                       | +1.86 |
| APOBEC4  | NP_982279 | Apolipoprotein B mRNA editing enzyme, catalytic polypeptide-like 4          | hydrolase activity; mRNA processing                                                                                                              | +1.86 |
| ADM      | NP_001115 | Adrenomedullin                                                              | hormone activity; cell-cell signaling; extracellular                                                                                             | +1.85 |
| ZFP30    | NP_055713 | Zinc finger protein 30 homolog (mouse)                                      | DNA binding; regulation of transcription; nucleus                                                                                                | +1.84 |
| CDKN1A   | NP_510867 | Cyclin-dependent kinase inhibitor 1A                                        | cyclin-dependent protein kinase inhibitor activity; cell cycle arrest; response to DNA damage stimulus                                           | +1.83 |
| EIF2AK3  | NP_004827 | Eukaryotic translation initiation factor 2-alpha kinase 3                   | eukaryotic translation initiation factor 2alpha kinase activity; endoplasmic reticulum unfolded protein response; endoplasmic reticulum membrane | +1.83 |
| GRPR     | NP_005305 | Gastrin-releasing peptide receptor                                          | bombesin receptor activity; G-protein coupled receptor protein signaling pathway; plasma membrane                                                | +1.83 |
| RDH10    | NP_742034 | Retinol dehydrogenase 10 (all-trans)                                        | oxidoreductase activity; visual perception; endoplasmic reticulum membrane                                                                       | +1.83 |
| PLAU     | NP_002649 | Plasminogen activator, urokinase                                            | kinase activity; serine-type endopeptidase activity; blood coagulation; extracellular                                                            | +1.83 |
| BTG2     | NP_006754 | BTG family, member 2                                                        | DNA repair; regulation of transcription; nucleus                                                                                                 | +1.82 |
| RUNX1    | NP_001745 | Runt-related transcription factor 1                                         | transcription activator activity; positive regulation of angiogenesis; nucleus                                                                   | +1.82 |
| DDIT4    | NP_061931 | DNA-damage-inducible transcript 4                                           | apoptosis; negative regulation of signal transduction; cytoplasm                                                                                 | +1.82 |
| TAS2R5   | NP_061853 | Taste receptor, type 2, member 5                                            | taste receptor activity; G-protein coupled receptor protein signaling pathway; integral to membrane                                              | +1.80 |
| ARHGAP12 | NP_060757 | Rho GTPase activating protein 12                                            | GTPase activator activity; signal transduction                                                                                                   | +1.80 |
| RRAGC    | NP_071353 | Ras-related GTP binding C                                                   | GTPase activity; RNA splicing; apoptosis; cell growth                                                                                            | +1.78 |
| SLC17A5  | NP_036566 | Solute carrier family 17 (anion/sugar transporter), member 5                | sugar:hydrogen symporter activity; anion transport; integral to plasma membrane                                                                  | +1.77 |
| TUBA3C   | NP_005992 | Tubulin, alpha 3c                                                           | GTPase activity; structural molecule activity; microtubule-based movement                                                                        | +1.77 |
| ZBTB43   | NP_054726 | Zinc finger and BTB domain containing 43                                    | zinc ion binding; regulation of transcription; nucleus                                                                                           | +1.76 |
| RHBDL2   | NP_060291 | Rhomboid, veinlet-like 2 (Drosophila)                                       | serine-type endopeptidase activity; signal transduction; integral to membrane                                                                    | +1.75 |
| PMAIP1   | NP_066950 | Phorbol-12-myristate-13-acetate-induced protein 1                           | caspase activation; induction of apoptosis; mitochondrion                                                                                        | +1.75 |
| ZNF430   | NP_079465 | Zinc finger protein 430                                                     | DNA binding; regulation of transcription; nucleus                                                                                                | +1.75 |
| PCF11    | NP_056969 | PCF11, cleavage and polyadenylation factor subunit, homolog (S. cerevisiae) | mRNA cleavage; nucleus                                                                                                                           | +1.75 |
| CMTM2    | NP_653274 | CKLF-like MARVEL transmembrane domain containing 2                          | cytokine activity; chemotaxis; integral to membrane                                                                                              | +1.75 |
| SGMS2    | NP_689834 | Sphingomyelin synthase 2                                                    | ceramide cholinephosphotransferase activity; kinase activity; lipid metabolic process; integral to Golgi membrane                                | +1.74 |

|           |           |                                                                                     |                                                                                                                                                        |       |
|-----------|-----------|-------------------------------------------------------------------------------------|--------------------------------------------------------------------------------------------------------------------------------------------------------|-------|
| BTG1      | NP_001722 | B-cell translocation gene 1, anti-proliferative                                     | transcription cofactor activity; cell migration; negative regulation of cell growth; regulation of apoptosis                                           | +1.74 |
| KCNJ13    | NP_002233 | Potassium inwardly-rectifying channel, subfamily J, member 13                       | voltage-gated ion channel activity; potassium ion transport; integral to membrane                                                                      | +1.73 |
| MAP3K8    | NP_005195 | Mitogen-activated protein kinase kinase kinase 8                                    | protein serine/threonine kinase activity; cytoplasm                                                                                                    | +1.73 |
| RHOBTB3   | NP_055714 | Rho-related BTB domain containing 3                                                 | GTPase activity; protein localization; nucleus                                                                                                         | +1.73 |
| TAS2R3    | NP_058639 | Taste receptor, type 2, member 3                                                    | G-protein coupled receptor activity; sensory perception of taste; integral to membrane                                                                 | +1.71 |
| SLCO1B3   | NP_062818 | Solute carrier organic anion transporter family, member 1B3                         | bile acid transmembrane transporter activity; organic anion transport; integral to plasma membrane                                                     | +1.70 |
| RNF19A    | NP_904355 | Ring finger protein 19A                                                             | ligase activity; microtubule cytoskeleton organization and biogenesis; ubiquitin-dependent protein catabolic process; centrosome; integral to membrane | +1.70 |
| HIST1H2AB | NP_003504 | Histone cluster 1, H2ab                                                             | DNA binding; nucleosome assembly; nucleus                                                                                                              | +1.70 |
| SOCS3     | NP_003946 | Suppressor of cytokine signaling 3                                                  | protein kinase inhibitor activity; JAK-STAT cascade; anti-apoptosis                                                                                    | +1.70 |
| NFKBIA    | NP_065390 | Nuclear factor of kappa light polypeptide gene enhancer in B-cells inhibitor, alpha | cytoplasmic sequestering of NF-kappaB; regulation of cell proliferation; response to lipopolysaccharide                                                | +1.70 |
| HBEGF     | NP_001936 | Heparin-binding EGF-like growth factor                                              | growth factor activity; positive regulation of keratinocyte migration; extracellular; integral to plasma membrane                                      | +1.70 |
| ARID5B    | NP_115575 | AT rich interactive domain 5B (MRF1-like)                                           | DNA binding; regulation of transcription; nucleus                                                                                                      | +1.69 |
| HOMER1    | NP_004263 | Homer homolog 1 (Drosophila)                                                        | metabotropic glutamate receptor, phospholipase C activating pathway; postsynaptic membrane                                                             | +1.69 |
| RIOK3     | NP_003822 | RIO kinase 3 (yeast)                                                                | protein serine/threonine kinase activity; chromosome segregation                                                                                       | +1.69 |
| RLF       | NP_036553 | Rearranged L-myc fusion                                                             | transcription factor activity; nucleus                                                                                                                 | +1.68 |

**Table SII.** One hundred most under-expressed genes in HNE-treated, HSF1 siRNA-transfected vs. HNE-treated, NEG siRNA-transfected samples. Genes with RefSeq entries and Gene Ontology terms are represented.

| Gene Name | Protein RefSeq | Gene Description                                       | Gene Ontology Terms, Examples                                                                                                   | Fold Change |
|-----------|----------------|--------------------------------------------------------|---------------------------------------------------------------------------------------------------------------------------------|-------------|
| ARPM1     | NP_115876      | Actin related protein M1                               | structural molecule activity; cytoskeleton                                                                                      | -5.13       |
| HSPA1A    | NP_005336      | Heat shock 70kDa protein 1A                            | protein binding; response to stress                                                                                             | -4.54       |
| P4HA2     | NP_004190      | Proline 4-hydroxylase, alpha polypeptide II            | oxidoreductase activity; protein metabolic process; endoplasmic reticulum lumen                                                 | -4.48       |
| DNAJA4    | NP_061072      | DnaJ (Hsp40) homolog, subfamily A, member 4            | heat shock protein binding; protein folding; membrane                                                                           | -4.14       |
| CAP2      | NP_006357      | CAP, adenylate cyclase-associated protein, 2 (yeast)   | actin binding; oxidoreductase activity; metabolic process; plasma membrane                                                      | -4.01       |
| ARHGAP19  | NP_116289      | Rho GTPase activating protein 19                       | GTPase activator activity; signal transduction                                                                                  | -3.81       |
| CYP39A1   | NP_057677      | Cytochrome P450, family 39, subfamily A, polypeptide 1 | steroid 7-alpha-hydroxylase activity; cholesterol catabolic process; oxidation reduction; endoplasmic reticulum membrane        | -3.73       |
| CLU       | NP_001822      | Clusterin                                              | apoptosis; complement activation; innate immune response; extracellular                                                         | -3.63       |
| HSPA6     | NP_002146      | Heat shock 70kDa protein 6                             | ATP binding; response to unfolded protein                                                                                       | -3.20       |
| SQRDL     | NP_067022      | Sulfide quinone reductase-like (yeast)                 | oxidoreductase activity; mitochondrial inner membrane                                                                           | -3.16       |
| CRYAB     | NP_001876      | Crystallin, alpha B                                    | structural constituent of eye lens; anti-apoptosis; cytoplasm                                                                   | -3.14       |
| MLKL      | NP_689862      | Mixed lineage kinase domain-like                       | ATP binding; protein kinase activity                                                                                            | -3.04       |
| HSPA1B    | NP_005337      | Heat shock 70kDa protein 1B                            | ATP binding; unfolded protein binding; response to unfolded protein                                                             | -3.03       |
| CHRNA5    | NP_000736      | Cholinergic receptor, nicotinic, alpha 5               | acetylcholine receptor activity; ion transport; synaptic transmission; synapse                                                  | -3.01       |
| AP4B1     | NP_006585      | Adaptor-related protein complex 4, beta 1 subunit      | protein binding; intracellular protein transport; Golgi apparatus                                                               | -2.94       |
| SLC7A11   | NP_055146      | Solute carrier family 7, member 11                     | cystine:glutamate antiporter activity; integral to membrane                                                                     | -2.80       |
| GKAP1     | NP_079487      | G kinase anchoring protein 1                           | kinase activity; signal transduction; Golgi apparatus                                                                           | -2.74       |
| HSPA4L    | NP_055093      | Heat shock 70kDa protein 4-like                        | ATP binding; response to unfolded protein                                                                                       | -2.74       |
| DNAJB1    | NP_006136      | DnaJ (Hsp40) homolog, subfamily B, member 1            | heat shock protein binding; protein folding; cytoplasm                                                                          | -2.70       |
| TAS2R46   | NP_795368      | Taste receptor, type 2, member 46                      | G-protein coupled receptor activity; sensory perception of taste; integral to membrane                                          | -2.59       |
| RAB2B     | NP_116235      | RAB2B, member RAS oncogene family                      | ATP binding; transcription factor binding; small GTPase mediated signal transduction                                            | -2.52       |
| RPL7A     | NP_000963      | Ribosomal protein L7a                                  | RNA binding; structural constituent of ribosome                                                                                 | -2.45       |
| TAGLN     | NP_001001522   | Transgelin                                             | actin binding; muscle development; cytoplasm                                                                                    | -2.43       |
| HSD17B7   | NP_057455      | Hydroxysteroid (17-beta) dehydrogenase 7               | 3-keto-steroid reductase activity; oxidoreductase activity; endoplasmic reticulum membrane                                      | -2.41       |
| CASP7     | NP_203125      | Caspase 7                                              | cysteine-type endopeptidase activity; apoptosis                                                                                 | -2.39       |
| HIBCH     | NP_055177      | 3-hydroxyisobutyryl-Coenzyme A hydrolase               | hydrolase activity; branched chain family amino acid catabolic process; mitochondrion                                           | -2.32       |
| IFNE1     | NP_795372      | Interferon epsilon 1                                   | response to virus; extracellular                                                                                                | -2.22       |
| ENPP1     | NP_006199      | Ectonucleotide pyrophosphatase/phosphodiesterase 1     | nucleotide diphosphatase activity; metabolic process; negative regulation of cell growth; bone remodeling; integral to membrane | -2.20       |
| TRIM26    | NP_003440      | Tripartite motif-containing 26                         | DNA binding; protein binding                                                                                                    | -2.18       |

|          |           |                                                                        |                                                                                                                                   |       |
|----------|-----------|------------------------------------------------------------------------|-----------------------------------------------------------------------------------------------------------------------------------|-------|
| MICB     | NP_005922 | MHC class I polypeptide-related sequence B                             | immune response; antigen processing and presentation; response to heat; response to oxidative stress; integral to plasma membrane | -2.18 |
| ARL15    | NP_061960 | ADP-ribosylation factor-like 15                                        | GTP binding                                                                                                                       | -2.17 |
| CRYZ     | NP_001880 | Crystallin, zeta (quinone reductase)                                   | oxidoreductase activity; visual perception; cytoplasm                                                                             | -2.15 |
| TRIM68   | NP_060543 | Tripartite motif-containing 68                                         | protein binding; cytoplasm                                                                                                        | -2.15 |
| RNASEL   | NP_066956 | Ribonuclease L (2',5'-oligoadenylate synthetase-dependent)             | hydrolase activity; RNA binding; mRNA processing; cytoplasm                                                                       | -2.15 |
| AFF1     | NP_005926 | AF4/FMR2 family, member 1                                              | transcription factor activity; nucleus                                                                                            | -2.11 |
| USP30    | NP_116052 | Ubiquitin specific peptidase 30                                        | cysteine-type peptidase activity; ubiquitin thiolesterase activity; ubiquitin-dependent protein catabolic process                 | -2.09 |
| NKRF     | NP_060014 | NFKB repressing factor                                                 | DNA binding; negative regulation of transcription                                                                                 | -2.09 |
| RFESD    | NP_775498 | Rieske (Fe-S) domain containing                                        | 2 iron, 2 sulfur cluster binding; oxidoreductase activity                                                                         | -2.08 |
| DGKI     | NP_004708 | Diacylglycerol kinase, iota                                            | diacylglycerol kinase activity; activation of protein kinase C activity                                                           | -2.08 |
| TMEFF1   | NP_003683 | Transmembrane protein with EGF-like and two follistatin-like domains 1 | multicellular organismal development; integral to membrane                                                                        | -2.07 |
| NPAL2    | NP_079035 | NIPA-like domain containing 2                                          | integral to membrane                                                                                                              | -2.07 |
| GIN52    | NP_057179 | GIN5 complex subunit 2 (Psf2 homolog)                                  | protein binding; DNA replication; nucleus                                                                                         | -2.05 |
| PPM1K    | NP_689755 | Protein phosphatase 1K (PP2C domain containing)                        | protein serine/threonine phosphatase activity; mitochondrial matrix                                                               | -2.04 |
| LASS6    | NP_982288 | LAG1 homolog, ceramide synthase 6                                      | transcription factor activity; lipid biosynthetic process; endoplasmic reticulum membrane; nuclear membrane                       | -2.04 |
| ABHD3    | NP_612213 | Abhydrolase domain containing 3                                        | carboxylesterase activity; integral to membrane                                                                                   | -2.03 |
| UBR2     | NP_056070 | Ubiquitin protein ligase E3 component n-recognin 2                     | ubiquitin-protein ligase activity; ubiquitin-dependent protein catabolic process; nucleus                                         | -2.03 |
| SNAP23   | NP_003816 | Synaptosomal-associated protein, 23kDa                                 | post-Golgi vesicle-mediated transport; vesicle targeting; synapse                                                                 | -2.02 |
| ANKMY2   | NP_064715 | Ankyrin repeat and MYND domain containing 2                            | zinc ion binding                                                                                                                  | -2.02 |
| RAD51    | NP_002866 | RAD51 homolog (RecA homolog, E. coli) (S. cerevisiae)                  | damaged DNA binding; ATPase activity; double strand break repair; homologous recombination; nucleus                               | -2.02 |
| LMAN2L   | NP_110432 | Lectin, mannose-binding 2-like                                         | sugar binding; ER to Golgi vesicle-mediated transport; integral to membrane                                                       | -2.02 |
| CSRP2    | NP_001312 | Cysteine and glycine-rich protein 2                                    | cell proliferation; multicellular organismal development; nucleus                                                                 | -2.01 |
| SLFN5    | NP_659412 | Schlafen family member 5                                               | ATP binding; cell differentiation                                                                                                 | -1.99 |
| DPYSL2   | NP_001377 | Dihydropyrimidinase-like 2                                             | hydrolase activity; cell differentiation; nervous system development                                                              | -1.99 |
| LRP2BP   | NP_060879 | LRP2 binding protein                                                   | protein binding; cytoplasm                                                                                                        | -1.98 |
| BST2     | NP_004326 | Bone marrow stromal cell antigen 2                                     | signal transducer activity; B cell activation; humoral immune response                                                            | -1.98 |
| MMP1     | NP_002412 | Matrix metalloproteinase 1                                             | metalloendopeptidase activity; collagen catabolic process; extracellular                                                          | -1.97 |
| BTN2A3   | NP_076923 | Butyrophilin, subfamily 2, member A3                                   | integral to membrane                                                                                                              | -1.96 |
| PRAME    | NP_996836 | Preferentially expressed antigen in melanoma                           | protein binding                                                                                                                   | -1.96 |
| SERPINH1 | NP_001226 | Serpin peptidase inhibitor, clade H (heat shock protein 47), member 1  | serine-type endopeptidase inhibitor activity; unfolded protein binding; response to unfolded protein; endoplasmic reticulum       | -1.96 |
| PMP22    | NP_000295 | Peripheral myelin protein 22                                           | myelin formation; mechanosensory behavior; integral to membrane                                                                   | -1.95 |

|              |                  |                                                                  |                                                                                                                        |       |
|--------------|------------------|------------------------------------------------------------------|------------------------------------------------------------------------------------------------------------------------|-------|
| N6AMT1       | NP_037372        | N-6 adenine-specific DNA methyltransferase 1 (putative)          | methyltransferase activity; nucleic acid binding                                                                       | -1.95 |
| GPN1         | NP_009197        | GPN-loop GTPase 1                                                | GTP binding; small GTPase mediated signal transduction; cytoplasm                                                      | -1.94 |
| AASS         | NP_005754        | Aminoacidipate-semialdehyde synthase                             | oxidoreductase activity; lysine catabolic process; mitochondrion                                                       | -1.94 |
| TRIM2        | NP_056086        | Tripartite motif-containing 2                                    | protein binding; cytoplasm                                                                                             | -1.93 |
| STAT2        | NP_005410        | Signal transducer and activator of transcription 2               | signal transducer activity; transcription factor activity; JAK-STAT cascade                                            | -1.93 |
| BTBD8        | NP_899065        | BTB (POZ) domain containing 8                                    | protein binding                                                                                                        | -1.92 |
| ANLN         | NP_061155        | Anillin                                                          | actin binding; cell cycle; cytokinesis                                                                                 | -1.92 |
| SLC25A2<br>7 | NP_004268        | Solute carrier family 25, member 27                              | mitochondrial transport; mitochondrial inner membrane                                                                  | -1.92 |
| CALD1        | NP_149129        | Caldesmon 1                                                      | actin binding; calmodulin binding; cell motion; muscle contraction; cytoskeleton                                       | -1.92 |
| PIR          | NP_003653        | Pirin                                                            | iron ion binding; transcription cofactor activity; nucleus                                                             | -1.91 |
| INSIG2       | NP_057217        | Insulin induced gene 2                                           | cholesterol metabolic process; endoplasmic reticulum membrane                                                          | -1.91 |
| BAG3         | NP_004272        | BCL2-associated athanogene 3                                     | Hsp70/Hsc70 protein regulator activity; anti-apoptosis; cytosol                                                        | -1.88 |
| LIMCH1       | NP_055803        | LIM and calponin homology domains 1                              | actin binding; actomyosin structure organization and biogenesis                                                        | -1.88 |
| SUGT1        | NP_006695        | SGT1, suppressor of G2 allele of SKP1 (S. cerevisiae)            | mitosis; ubiquitin-dependent protein catabolic process; kinetochore; ubiquitin ligase complex                          | -1.87 |
| PCDHB3       | NP_061760        | Protocadherin beta 3                                             | protein binding; calcium-dependent cell-cell adhesion; integral to plasma membrane                                     | -1.87 |
| CDGAP        | NP_065805        | Cdc42 GTPase-activating protein                                  | GTPase activator activity; signal transduction                                                                         | -1.86 |
| STIP1        | NP_006810        | Stress-induced-phosphoprotein 1 (Hsp70/Hsp90 organizing protein) | response to stress                                                                                                     | -1.85 |
| GPBP1        | NP_075064        | GC-rich promoter binding protein 1                               | transcription factor activity                                                                                          | -1.85 |
| MORC4        | NP_078933        | MORC family CW-type zinc finger 4                                | ATP binding; zinc ion binding                                                                                          | -1.85 |
| DZIP3        | NP_055463        | DAZ interacting protein 3, zinc finger                           | RNA binding; ubiquitin-protein ligase activity; ubiquitin-dependent protein catabolic process                          | -1.84 |
| ACTN4        | NP_004915        | Actinin, alpha 4                                                 | actin filament binding; regulation of apoptosis; cytoskeleton                                                          | -1.84 |
| TTC30B       | NP_689730        | Tetratricopeptide repeat domain 30B                              | cell projection organization and biogenesis; cilium                                                                    | -1.83 |
| RANBP6       | NP_036548        | RAN binding protein 6                                            | protein transport; cytoplasm; nucleus                                                                                  | -1.83 |
| CARD6        | NP_115976        | Caspase recruitment domain family, member 6                      | protein binding; regulation of apoptosis                                                                               | -1.83 |
| TRMT12       | NP_060426        | tRNA methyltransferase 12 homolog (S. cerevisiae)                | methyltransferase activity; tRNA processing                                                                            | -1.82 |
| DBT          | NP_001909        | Dihydrolipoamide branched chain transacylase E2                  | acyltransferase activity; mitochondrial matrix                                                                         | -1.82 |
| PLOD1        | NP_000293        | Procollagen-lysine 1, 2-oxoglutarate 5-dioxygenase 1             | oxidoreductase activity; hydroxylysine biosynthetic process; response to hypoxia; rough endoplasmic reticulum membrane | -1.81 |
| OVOS2        | NP_0010739<br>71 | Ovostatin 2                                                      | serine-type endopeptidase inhibitor activity; extracellular                                                            | -1.81 |
| GBP3         | NP_060754        | Guanylate binding protein 3                                      | GTPase activity; immune response                                                                                       | -1.80 |
| FLOT2        | NP_004466        | Flotillin 2                                                      | cell adhesion; epidermis development; cell surface                                                                     | -1.79 |
| GPATCH<br>1  | NP_060495        | G patch domain containing 1                                      | nucleic acid binding; nuclear                                                                                          | -1.79 |
| CKS2         | NP_001818        | CDC28 protein kinase regulatory subunit 2                        | cyclin-dependent protein kinase regulator activity; cell cycle                                                         | -1.79 |

|          |           |                                                                |                                                                                             |       |
|----------|-----------|----------------------------------------------------------------|---------------------------------------------------------------------------------------------|-------|
| LANCL1   | NP_006046 | LanC lantibiotic synthetase component C-like 1 (bacterial)     | G-protein coupled receptor activity; integral to plasma membrane                            | -1.78 |
| ZKSCAN1  | NP_003430 | Zinc finger with KRAB and SCAN domains 1                       | transcription factor activity                                                               | -1.78 |
| EIF4EBP2 | NP_004087 | Eukaryotic translation initiation factor 4E binding protein 2  | protein binding; cAMP-mediated signaling; negative regulation of translational initiation   | -1.71 |
| SUOX     | NP_000447 | Sulfite oxidase                                                | oxidoreductase activity; mitochondrial intermembrane space                                  | -1.78 |
| DCLRE1B  | NP_073747 | DNA cross-link repair 1B (PSO2 homolog, <i>S. cerevisiae</i> ) | hydrolase activity; DNA repair; nucleus                                                     | -1.78 |
| LPCAT3   | NP_005759 | Lysophosphatidylcholine acyltransferase 3                      | acyltransferase activity; phospholipid biosynthetic process; endoplasmic reticulum membrane | -1.77 |
| PLCH1    | NP_055811 | Phospholipase C, eta 1                                         | hydrolase activity; intracellular signaling cascade; lipid catabolic process                | -1.77 |
| EXO1     | NP_569082 | Exonuclease 1                                                  | DNA binding; exonuclease activity; DNA repair; mismatch repair; nucleus                     | -1.77 |
